# Supplementary material for: Molecular Phylogenetics and Systematics of the Bivalve Family Ostreidae Based on rRNA Sequence-Structure Models and Multilocus Species Tree
Source: PubMed Central journal article supplement (PMC4177229; doi:10.1371/journal.pone.0108696), 2014-09-24

**Supplementary Figure S2.** Maximum-Likelihood phylogenetic tree of the Ostreidae derived from 42 sequences of 28S (956 positions) obtained from GenBank. The analysis was conducted in MEGA6 [Tamura et al., 2013. *Mol Biol Evol* 30: 2725-2729] based on the Tamura-Nei model with a discrete Gamma distribution, and using *Hytotissa hyotis*, *H. imbricata* and *Neopycnodonte cochlear* as outgroup. Genbank accession numbers are provided after species names; bootstrap support (>70) over 100 replicates is reported. The three main lineages are coloured as follows: Crassostreinae in violet; Saccostreinae in green; and Ostreinae in blue. \* indicate sequences selected for the multi-locus combined analyses and \*\* indicate sequences added for the species-tree analysis.

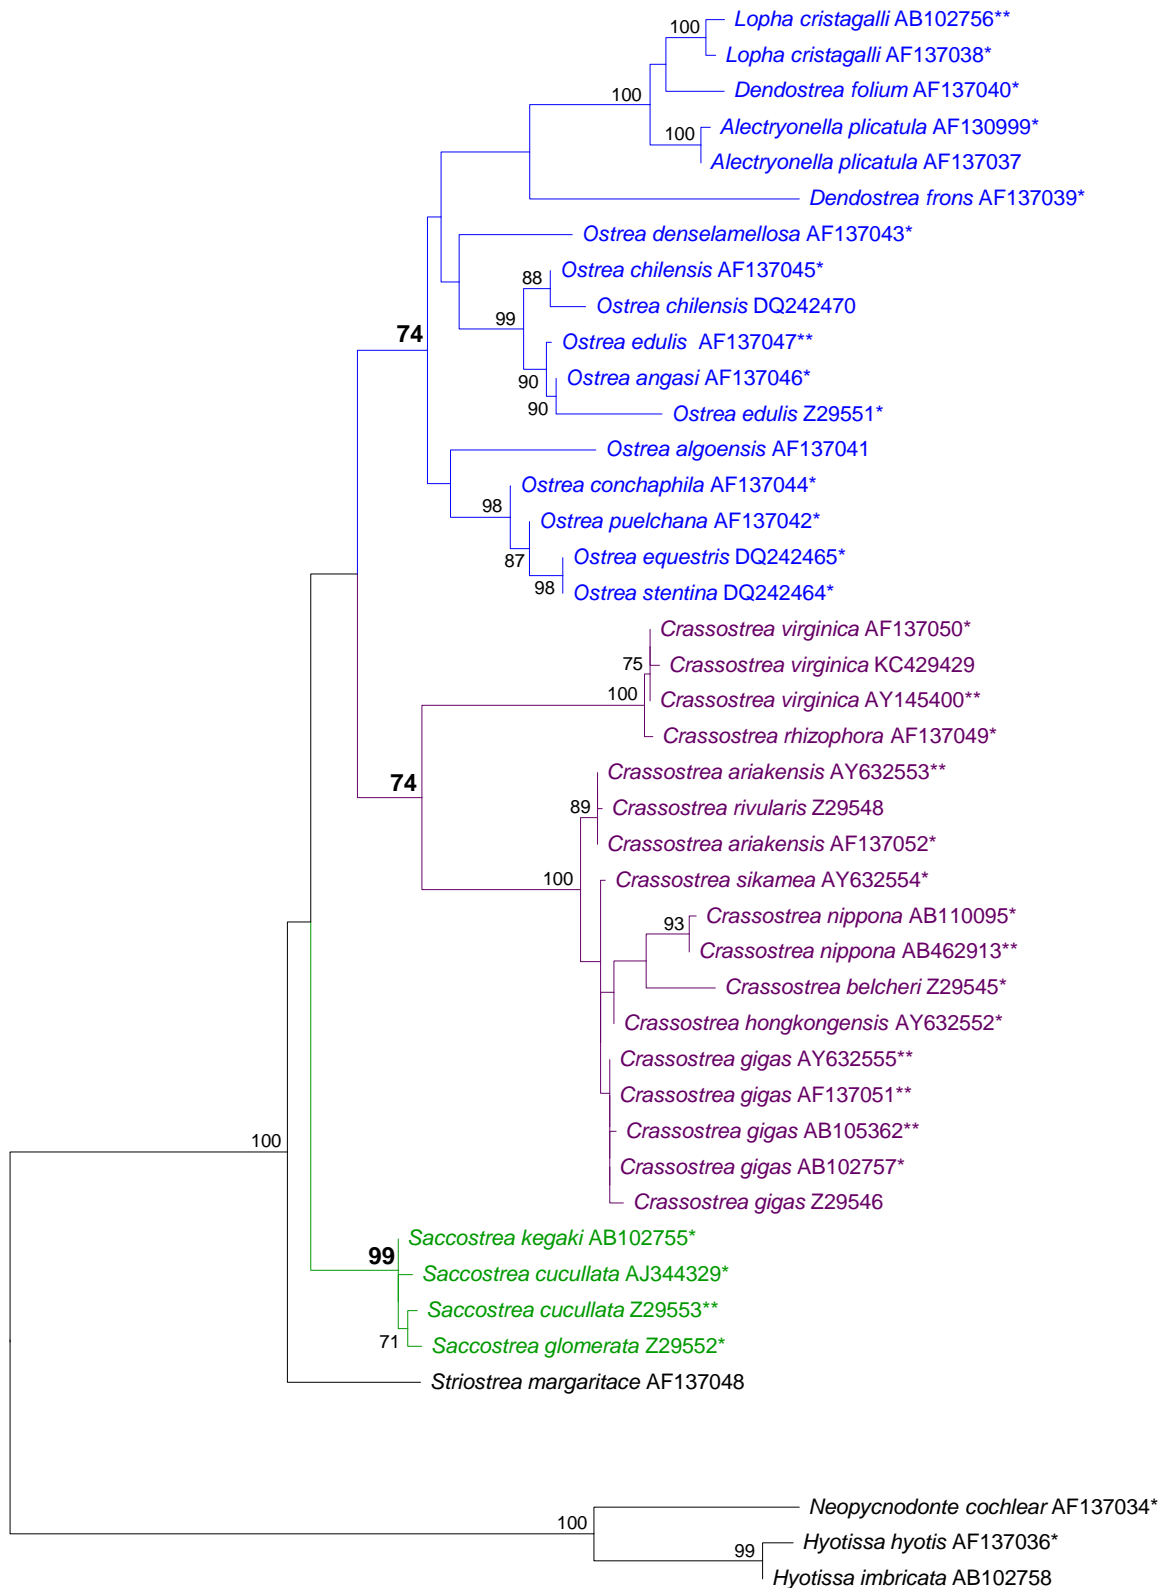

Supplement: pone.0108696.s002.pdf [file pone.0108696.s002.pdf]
